# Supplementary material for: Two‐Pore K+ Channel TREK‐1 Regulates Sinoatrial Node Membrane Excitability
Source: PubMed Central journal article supplement — J Am Heart Assoc. 2016 Apr 20;5(4):e002865. doi: 10.1161/JAHA.115.002865 (PMC4859279; doi:10.1161/jaha.115.002865), 2016-04-20
Supplement: JAH3-5-e002865-s001.pdf [file JAH3-5-e002865-s001.pdf]

## SUPPLEMENTAL MATERIAL

### Data S1: Supplemental Methods

**Mathematical model of murine sinoatrial action potential:** Equations and parameters that differ from original publication are provided below. All other equations and parameters are for central sinoatrial node cell in original publication.<sup>1</sup>

**TREK-1 current** – TREK-1 is modeled as a time-independent K<sup>+</sup> current with slight outward rectification ( $a_{rect}$ ) fit to experimental data.<sup>2</sup> Maximal channel conductance,  $\bar{g}_{TREK1}$ , was chosen to produce a current of 1.2  $\mu A/\mu F$  at +30 mV in agreement with experimentally measured difference in background K<sup>+</sup> current between wildtype and cardiac-specific TREK-1 knockout at room temperature (Figures 4A and 7A).  $E_K$  is the reversal potential for K<sup>+</sup>.

$$\begin{aligned}
 I_{TREK1} &= \bar{g}_{TREK1} a_{rect} (V_m - E_K) & [1] \\
 a_{rect} &= 1 / (1 + \exp((-V_m + 65)/52)) \\
 \bar{g}_{TREK1} &= 0.0311 \text{ nS/pF}
 \end{aligned}$$

**Ca<sub>v</sub>1.3 L-type Ca<sup>2+</sup> current ( $I_{CaL,D}$ )** – A formulation for Ca<sub>v</sub>1.3 L-type Ca<sup>2+</sup> current was included, consistent with presence of this distinct class of Ca<sup>2+</sup> channels in sinoatrial node.<sup>3</sup> Voltage-dependent activation ( $d_D$ ) and voltage-dependent inactivation ( $f_D$ ) were assumed to have same kinetics as Ca<sub>v</sub>1.2 L-type Ca<sup>2+</sup> current in original formulation but with respective steady state curves shifted 10 mV to the left.<sup>3, 4</sup> Ca<sup>2+</sup>-dependent inactivation was assumed to have same kinetics and steady-state dependence as Ca<sub>v</sub>1.2.<sup>5, 6</sup> A smaller conductance than that estimated previously<sup>3</sup> was used to produce a value for cycle length of spontaneous activation similar to that in original model.

$$\begin{aligned}
 I_{CaL,D} &= \bar{g}_{CaL,D} d_D f_D f_{Ca} (V_m - E_{Ca}) & [2] \\
 d_{D,\infty} &= 1 / (1 + \exp(-(V_m + 24.1)/6.0)) \\
 \alpha_{d,D} &= -0.02839 * (V_m + 35.0) / (\exp(-(V_m + 35.0)/2.5) - 1.0) - 0.0849 * V_m / (\exp(-V_m / 4.808) - 1.0) \text{ ms}^{-1} \\
 \beta_{d,D} &= 0.01143 * (V_m - 5.0) / (\exp((V_m - 5.0)/2.5) - 1.0) \text{ ms}^{-1} \\
 \tau_{d,D} &= 1 / (\alpha_{d,D} + \beta_{d,D}) \text{ ms} \\
 f_{D,\infty} &= 1 / (1 + \exp((V_m + 40)/5.0)) \\
 \tau_{f,D} &= 257.1 * \exp(-((V_m + 32.5)/13.9)) * ((V_m + 32.5)/13.9) + 44.3 \text{ ms} \\
 f_{Ca,\infty} &= 0.00035 / (0.00035 + [Ca^{2+}]_{ss}) \\
 \tau_{fCa} &= f_{Ca,\infty} / 0.021 \text{ ms} \\
 \bar{g}_{CaL,D} &= 0.0375 \text{ nS/pF}
 \end{aligned}$$

**Table S1. Regression coefficients indicating how changes in model parameters affect AP and  $\text{Ca}^{2+}$  transient properties.**

|                    | APA     | CL      | DDR     | APD       | $dV/dt_{\max}$ | MDP      | $\text{CaT}_{\text{amp}}$ | $\text{CaT}_{\text{width}}$ | $[\text{Ca}^{2+}]_{\text{i,dia}}$ |
|--------------------|---------|---------|---------|-----------|----------------|----------|---------------------------|-----------------------------|-----------------------------------|
| $g_{\text{CaL,d}}$ | 0.0737  | -0.1958 | 0.2829  | -0.1100   | 0.0319         | 4.373e-3 | 0.0934                    | 0.0379                      | 0.0677                            |
| $g_{\text{CaI}}$   | 0.3632  | -0.1550 | 0.1224  | 0.0807    | 0.7833         | -0.0265  | 0.7925                    | 0.7648                      | 0.2506                            |
| $g_{\text{CaT}}$   | -0.1054 | -0.2745 | 0.4415  | -4.205e-3 | -0.1298        | 0.0848   | 4.643e-3                  | -0.1257                     | 0.2047                            |
| $g_{\text{H}}$     | 0.0188  | -0.1723 | 0.2694  | -0.1241   | -0.0501        | 7.905e-3 | 0.0400                    | -0.0476                     | 0.0643                            |
| $g_{\text{Kr}}$    | 0.2152  | 0.3956  | 0.0319  | 0.1607    | 0.0273         | -0.8533  | 0.2115                    | -0.5523                     | -0.0913                           |
| $g_{\text{NaCa}}$  | 0.0914  | -0.0235 | 0.0543  | 0.0879    | 0.3140         | -0.0461  | 0.0467                    | -0.0480                     | -0.4972                           |
| $g_{\text{NaK}}$   | 0.4452  | 0.0264  | 0.2836  | 0.1178    | 0.5065         | -0.5092  | -0.3767                   | 0.0308                      | -0.7573                           |
| $g_{\text{To}}$    | -0.1359 | 0.1463  | -0.2293 | 0.0687    | -0.0866        | 0.0271   | -0.0252                   | -0.0248                     | 7.048e-3                          |
| $g_{\text{Trek}}$  | -0.1235 | 0.2267  | -0.4466 | -0.0364   | -0.0836        | 2.549e-3 | 0.0161                    | -0.2983                     | 9.593e-3                          |

AP indicates action potential; APA indicates AP amplitude; CL, cycle length; DDR, diastolic depolarization rate; APD, action potential duration at 50% repolarization; MDP, maximum diastolic potential;  $\text{CaT}_{\text{amp}}$ ,  $\text{Ca}^{2+}$  transient amplitude;  $\text{CaT}_{\text{width}}$ , width of  $\text{Ca}^{2+}$  transient at half maximum;  $[\text{Ca}^{2+}]_{\text{i,dia}}$ , diastolic intracellular  $\text{Ca}^{2+}$  concentration

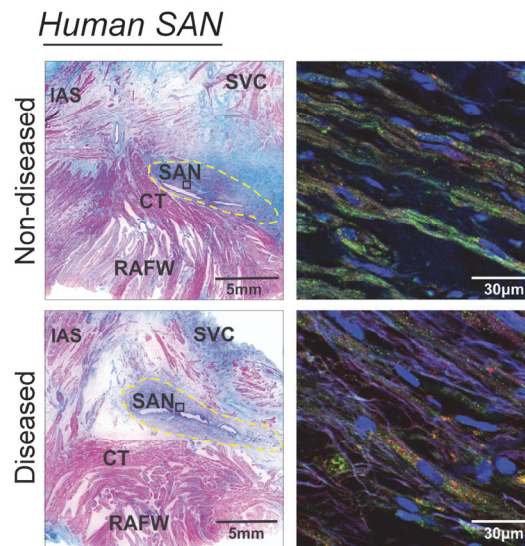

**Figure S1.** Masson's trichrome staining (*left*) or immunostaining for  $\beta_{IV}$ -spectrin (*green*) and alpha-actinin (*red*) (*right*) of paraffin embedded SAN sections from non-diseased human heart (identification number 921821) or from subject with coronary artery disease (identification number 168021). IAS - Intraatrial septum; SVC - Superior vena cava; SAN- sinoatrial node; CT – crista terminalis; RAFW – right atrial free wall.

## REFERENCES

1. Kurata Y, Matsuda H, Hisatome I, Shibamoto T. Regional difference in dynamical property of sinoatrial node pacemaking: role of  $na^+$  channel current. *Biophys J*. 2008;95:951-977.
2. Kim D. A mechanosensitive  $K^+$  channel in heart cells. Activation by arachidonic acid. *J Gen Physiol*. 1992;100:1021-1040.
3. Mangoni ME, Couette B, Bourinet E, Platzer J, Reimer D, Striessnig J, Nargeot J. Functional role of L-type  $Cav1.3 Ca^{2+}$  channels in cardiac pacemaker activity. *Proc Natl Acad Sci U S A*. 2003;100:5543-5548.
4. Zhang Z, Xu Y, Song H, Rodriguez J, Tuteja D, Namkung Y, Shin HS, Chiamvimonvat N. Functional Roles of  $Ca_v1.3$   $\alpha 1D$  calcium channel in sinoatrial nodes: insight gained using gene-targeted null mutant mice. *Circ Res*. 2002;90:981-987.
5. Kharche S, Yu J, Lei M, Zhang H. A mathematical model of action potentials of mouse sinoatrial node cells with molecular bases. *Am J Physiol Heart Circ Physiol*. 2011;301:H945-963.
6. Mangoni ME, Traboulsie A, Leoni AL, Couette B, Marger L, Le Quang K, Kupfer E, Cohen-Solal A, Vilar J, Shin HS, Escande D, Charpentier F, Nargeot J, Lory P. Bradycardia and slowing of the atrioventricular conduction in mice lacking  $CaV3.1/\alpha 1G$  T-type calcium channels. *Circ Res*. 2006;98:1422-1430.
